# Supplementary material
Source: PubMed Central journal article supplement (PMC3771581)
Supplement: NIHMS495074-supplement-01.pdf [file NIHMS495074-supplement-01.pdf]

## RAM Domain

DrosophilaNotch RAHGVTVYFPEGFRAPAAVMS--RRRRDFHGGEM--RNLNKKQVAMQSQSVGQPG-AHWSDDESIMPL  
 MouseNotch RQHGGQLWFPECFKVSSEASK--KKRRRPLGEDS--VGLKPLKNASDGALMDDNQNEWGDE--DLET  
 NvNotch RVYTKLWLFPECFVRRPVHQRRSLRRDFVCGEHSMSRSMKSSDLEEDAVGGDLTPPQEAR-DAKR

## LNR Domains

DrosophilaNotch CDKRCCTEKQGNQICDSDCNTYACNFDGNDCSLGIN-FRANCTAN-----ECWKKF  
 MouseNotch CELPECCQVDAGNKVCFNLQCNNEACGWDGGDCSLNYNDPMKKNCTQSL----CCWKYF  
 NvNotch CPVPMCAKRFDDGKCNPKCNTHECNWDGTTCSLGIK-FNSNCTTVTKSGKACYQVF

DrosophilaNotch KNGKCNEECNNAACHYDGHDCERKLSKCDSLFDAYCQKHYGDGFCQYGCNNAECSW  
 MouseNotch SDGHCDSCQNSAGCLFDGFDQQLTEGQCNPYDQYCKDHFSDGHCDQGCNSAECEW  
 NvNotch ANGVCDRECNTEGGCLFDGFDCKPSVPRKG--ADKYCAARFANAECDAICNNVACQN

DrosophilaNotch DGLDCENKTQSPVLAE  
 MouseNotch DGLDCAEHVP-ERLAA  
 NvNotch DGLDCSFKXP--EIVE

## Ankyrin Repeats

DrosophilaNotch DKTGETSLHLAARPARADAARKRLLDAGADANCCDNTGRTPLHAAVAADAMGVFQILLRNR  
 MouseNotch DRTGETALHLAAYSRSDRRKH-LEASADANIQNNMGRTPHAAVSAADAGGVFQILLRNR  
 NvNotch DIEKETPLHLAARHSRADAARKRLLEAGADPNARDKLGRTPLHLAVGADAQGVFQILLRNR

DrosophilaNotch ATNINARMHDGTTPLILAARLAIEGMVEDLITADADINAAENSGRTALEWAAAVNNTAV  
 MouseNotch ATDLDARMHGTTPLILAARLAVEGMLLEDLINSHADVNAVDDLCRSALEWAAAVNVDA  
 NvNotch TTDLEAAMEHGTTPLILAARLDLDDIVKDLIKASCKVNNVBAQGRSALEWAAAVNSHEVT

DrosophilaNotch NILLMHNANRDAQDDKDETPLFLAAREGSSYACKALLONTANR  
 MouseNotch VVLLKNGANKDIENKKEETSLEPLSIRRESYETAKVLLDHFANR  
 NvNotch SEICKNGAKKDAQDDKQGTPLFLGAREGSEAVRILLLSYANR

**SupplementalFigure1: Conserved domains of Nv Notch in comparison to Mouse and Drosophila.** Invariant residues shared by all three species are pink while those shared between Nematostella and one of the two species are blue.

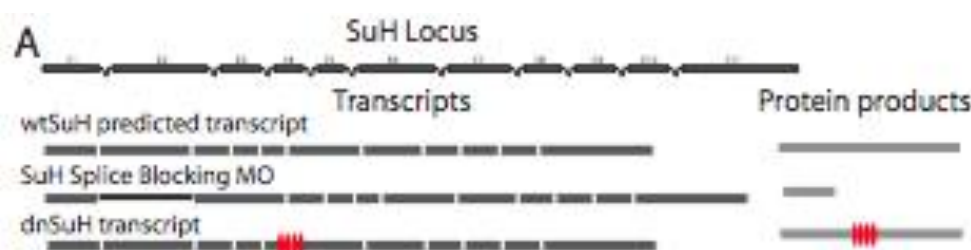

**B**

|            |                                                              |       |
|------------|--------------------------------------------------------------|-------|
| DeSuH      | EEKRLTSEAMNRYLKERGGQTVLLILBAKVAGKSYGNERKRFPCPPCVYLMGGGKRRKRD | [60]  |
| DeSuH      | QPKRLTSEAMNRYLKERGGQTVLLILBAKVAGKSYGNERKRFPCPPCVYLMGGGKRRKRD | [60]  |
| HaSuH      | PPKRLTSEAMNRYLKERGGQTVLLILBAKVAGKSYGNERKRFPCPPCVYLMGGGKRRKRD | [60]  |
| NvSuH      | MDATLTIDVVMN-----GLQTVVIFSAKVAGKSYGNERKRFPCPPCVYLMGGGKRRKRD  | [55]  |
| XenopusSuH | QPKRLTSEAMNRYLKERGGQTVLLILBAKVAGKSYGNERKRFPCPPCVYLMGGGKRRKRD | [60]  |
| <hr/>      |                                                              |       |
| DeSuH      | MLQGGDSE-QGAGLCAFTIGIGRS-DQHQQLDLNGQYCAARTLFIISDSEKRRHPLSVK  | [118] |
| DeSuH      | MEKQDCE-DESDPCAFIGIGRS-DQHQQLDLNGQYCAARTLFIISDSEKRRHPLSVK    | [118] |
| HaSuH      | NERQDCE-QSDPCAFIGIGRS-DQHQQLDLNGQYCAARTLFIISDSEKRRHPLSVK     | [118] |
| NvSuH      | SDQAGSDGQDQVAFVAFIGIGRSQDQDGLIIEKQYGAARTLFIISDSEKRRHPLSVK    | [115] |
| XenopusSuH | NERQDCE-QSDPCAFIGIGRS-DQHQQLDLNGQYCAARTLFIISDSEKRRHPLSVK     | [118] |
| <hr/>      |                                                              |       |
| DeSuH      | MFYGNAGDIQVFLERRIRVIEKPSKRRQSLKNAQLCIASQTVVALFNLRSGQVSTRYLE  | [178] |
| DeSuH      | MFYGNAGDIQVFLERRIRVIEKPSKRRQSLKNAQLCIASQTVVALFNLRSGQVSTRYLE  | [178] |
| HaSuH      | MFYGNAGDIQVFLERRIRVIEKPSKRRQSLKNAQLCIASQTVVALFNLRSGQVSTRYLE  | [178] |
| NvSuH      | LLYFGQDVGIFNERRIRVIEKPSKRRQSLKNAQLCIASQTVVALFNLRSGQVSTRYLE   | [175] |
| XenopusSuH | MFYGNAGDIQVFLERRIRVIEKPSKRRQSLKNAQLCIASQTVVALFNLRSGQVSTRYLE  | [178] |
| <hr/>      |                                                              |       |
| DeSuH      | VSDGNFASDQNGAFYIILLDDESESEKFTVSDGYIHYGQTVKLVCSVTGMALPRLII    | [238] |
| DeSuH      | VSDGNFASDQNGAFYIILLDDESESEKFTVSDGYIHYGQTVKLVCSVTGMALPRLII    | [238] |
| HaSuH      | VSDGNFASDQNGAFYIILLDDESESEKFTVSDGYIHYGQTVKLVCSVTGMALPRLII    | [238] |
| NvSuH      | VSDGNFASDQNGAFYIILLDDESESEKFTVSDGYIHYGQTVKLVCSVTGMALPRLII    | [235] |
| XenopusSuH | VSDGNFASDQNGAFYIILLDDESESEKFTVSDGYIHYGQTVKLVCSVTGMALPRLII    | [238] |
| <hr/>      |                                                              |       |
| DeSuH      | KKYDQDALLDADDVPSQLKCAFYLRKTERMYLCLC-QERLIQFQATPCPKKFNKEMIN   | [297] |
| DeSuH      | KKYDQDALLDADDVPSQLKCAFYLRKTERMYLCLC-QERLIQFQATPCPKKFNKEMIN   | [298] |
| HaSuH      | KKYDQDALLDADDVPSQLKCAFYLRKTERMYLCLC-QERLIQFQATPCPKKFNKEMIN   | [297] |
| NvSuH      | KKYDQDALLDADDVPSQLKCAFYLRKTERMYLCLC-QERLIQFQATPCPKKFNKEMIN   | [294] |
| XenopusSuH | KKYDQDALLDADDVPSQLKCAFYLRKTERMYLCLC-QERLIQFQATPCPKKFNKEMIN   | [297] |
| <hr/>      |                                                              |       |
| DeSuH      | DGASWTIISTDKASTTYTEGNGFVPSVPTVFP-VVSEQLMGDDGVANLELTQGNPTFNL  | [356] |
| DeSuH      | DGASWTIISTDKASTTYTEGNGFVPSVPTVFP-VVSEQLMGDDGVANLELTQGNPTFNL  | [358] |
| HaSuH      | DGASWTIISTDKASTTYTEGNGFVPSVPTVFP-VVSEQLMGDDGVANLELTQGNPTFNL  | [356] |
| NvSuH      | DGASWTIISTDKASTTYTEGNGFVPSVPTVFP-VVSEQLMGDDGVANLELTQGNPTFNL  | [353] |
| XenopusSuH | DGASWTIISTDKASTTYTEGNGFVPSVPTVFP-VVSEQLMGDDGVANLELTQGNPTFNL  | [356] |
| <hr/>      |                                                              |       |
| DeSuH      | QVWFQDVAETMYRCDSNLCVFPDLSAFREGHRNVKQVQVPTLVRRDGIYVSTGLTF     | [416] |
| DeSuH      | QVWFQDVAETMYRCDSNLCVFPDLSAFREGHRNVKQVQVPTLVRRDGIYVSTGLTF     | [418] |
| HaSuH      | QVWFQDVAETMYRCDSNLCVFPDLSAFREGHRNVKQVQVPTLVRRDGIYVSTGLTF     | [416] |
| NvSuH      | QVWFQDVAETMYRCDSNLCVFPDLSAFREGHRNVKQVQVPTLVRRDGIYVSTGLTF     | [413] |
| XenopusSuH | QVWFQDVAETMYRCDSNLCVFPDLSAFREGHRNVKQVQVPTLVRRDGIYVSTGLTF     | [416] |
| <hr/>      |                                                              |       |
| DeSuH      | TYTFEPGPRPICS-AAGATLRAN                                      | [439] |
| DeSuH      | TYTFEPGPRPICS-AAGATLRAN                                      | [440] |
| HaSuH      | TYTFEPGPRPICS-AAGATLRAN                                      | [438] |
| NvSuH      | TYTFEPVNPALS-VADSVLRGE                                       | [435] |
| XenopusSuH | TYTFEPGPRPICS-AAGATLRAN                                      | [438] |

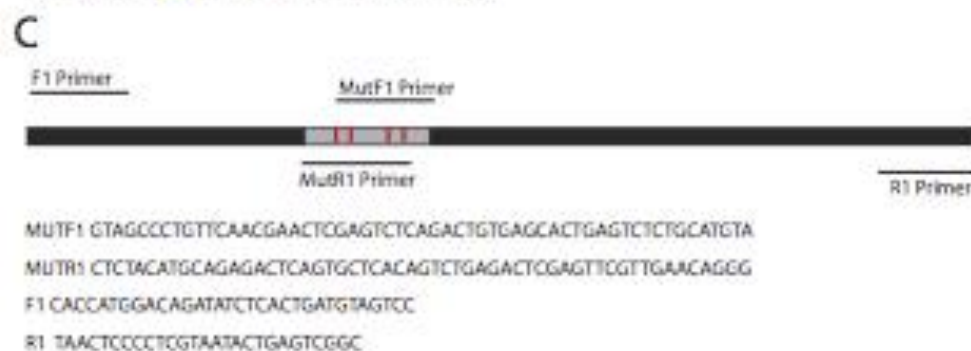

## Supplemental Figure 2: *Nematostella* Su(H) and experimentally modified forms

A, The *SuH* locus consists of eleven exons (E) and ten introns (solid line). Predicted transcript structures in wildtype (wt) transcripts, those generated by splice-blocking morpholin directed against *SuH* and that generated for dominant negative overexpression (*dnSu(H)*). Red ovals indicate the position of introduced mutations in the DNA binding site. The size of predicted protein products resulting from the transcripts are shown in light gray substitute residues in the DNA-binding site depicted in red. B, Suppressor of Hairless SuH/RBP-Jkappa is highly conserved between *Nematostella* and Bilateria taxa and is invariant in the majority of residues in fish (Dr), frog (*Xenopus*), human (Hs), flies (Dm) and *Nematostella* (Nv). The conserved DNA binding domains, LAG1 (blue), beta-trefoil (yellow), and TIG (green) are highlighted. A portion of the conserved beta-trefoil DNA-binding site is shaded in gray and residues substituted for dominant negative functional studies are shown in red. C, Construction of the dominant negative SuH, *dnSuH*, construct through introduction of point mutations by PCR with the specified primers. Point mutations in the DNA binding domain are shown in red.

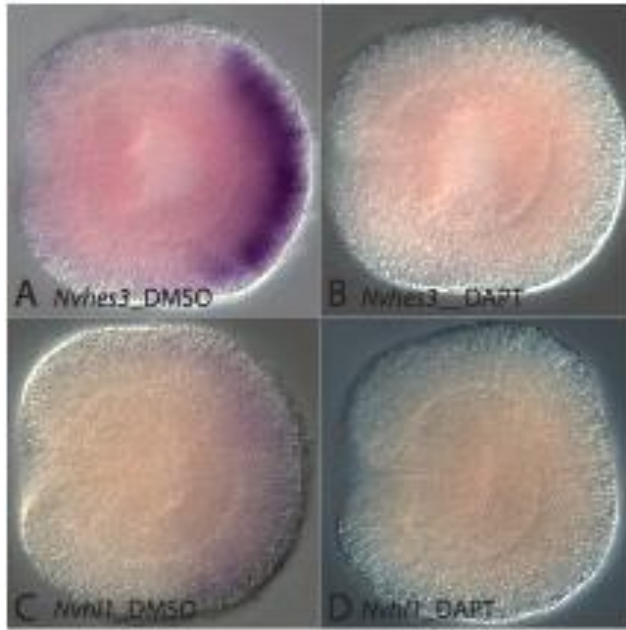

**Supplemental Figure 3: DAPT treatment in 24 hpf embryos results in a change in *hes* and *hes***

**-**

***like* gene expression.** A, 24 hpf control DMSO treated embryo showing a wild type expression of *Nvhes3* in the aboral ectoderm. B, Expression of *Nvhes3* is completely lost in DAPT-treated 24 hpf embryos. C, *Nvhl* expression in aboral ectoderm of a control DMSO treated embryo. D, *Nvhl* expression is completely absent in a DAPT treated embryo.

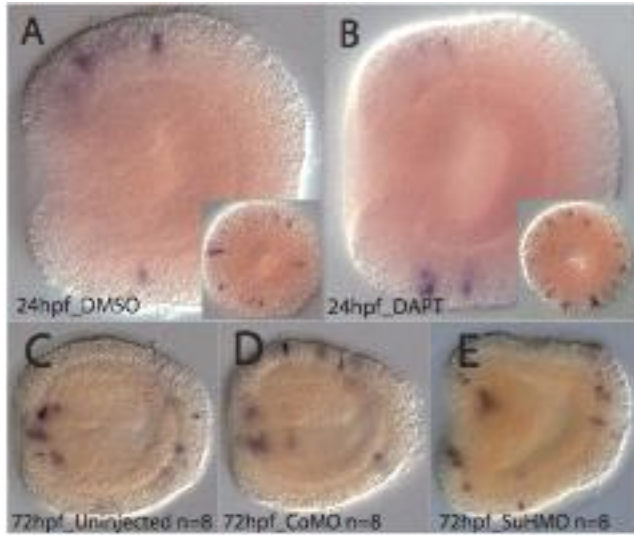

Blocking Notch Causes an Increase in Neural Cell Types

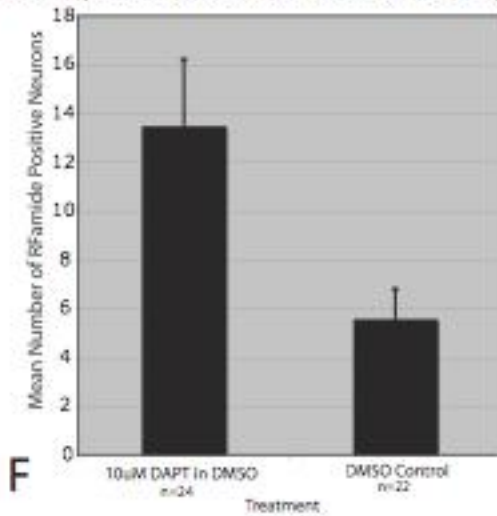

**SupplementalFigure4:ThenumberofNvanthoRFamideexpressingneuronsincreasesin**

**DAPTtreatedembryosA-**

B,EmbryostreatedwithDAPThavemoreneurons(B)comparedwithcontrolstreatedonlywith DMSO(A)at24hours.C-

E,EmbryosinjectedwithaNvSu(H)morpholinodotshowanincreaseinthenumerofofNvantho RFamideexpressingcellswhencomparedwithcontrolembrjos.F,Thenumberofneuronsinem

bryostreatedwithDAPTandDMSOat20hpf.

| PublicationName | Simionatoet.al | JGIproteinID | GenBankID |
|-----------------|----------------|--------------|-----------|
| NvNotch         |                |              | JN982705  |
| NvHes1          | Nem50          | 28948        | JN982707  |
| NvHes2          | Nem53          | 98450        | JN982708  |
| NvHes3          | Nem60          | 241656       | JN982709  |
| NvHL1           | Nem51          | 47054        | JN982710  |
| NvHes4          | Nem52          | 67328        | JN982711  |
| NvHL2           | Nem56          | 241655       | JN982712  |
| NvHL3           | Nem62          | 242118       | JN982713  |
| NvRDSL1         |                | 60816        | JN982715  |
| NvRDSL2         | 11703          | 130979       | JN982714  |

### Supplemental Table 1 Names in red are names used in manuscript

#### >NvNotch/Notch Translation

SCPKNFTGARCEIDVDECTTLSQPCQNGGTC SNVYGGYMCRCITGWDGADCSVNIDECKQNDPFPRCQHGGTCVDKIGSYT  
 CICPPGKTGLVCNFDDECASNPCSANATCVTSFSGKASCICNSGWTGKNCDVDIKECEGDSSPCYHGGTCRDIPIGSFVDCVCP  
 GFAGARCEDNINECESNPCVHGLCLDYQNKFEACACSKGYTGRLCDVEINECDSNPCLNGGQCHDGLGNYSTCQVGYVGEI  
 CQTNYYDDCASNPCQNDGTCQDQDIAQYTCLCPLGFTGKSCETNTNECAGNPCMNMGTICIDGINSFRCQCPLGFTGNRCETEID  
 ECESPPCQNGGTCKDKINGYVICPPGASGTHCENDPNDCPANACQNGGVCIDGMNTYSCKCHPGFTGFSCGVPVNECASSP  
 CRNGGTCEGDVAQYYCRCRDGYTGKSKTVLLTLNLQMKNAHSFSGKNCEVRIDSCIDHTCQNGASCVSSTPYAYSCQCKPG  
 YTGQYCETDVDECAARPCVNGACVDGVNGFICRDPGFTGDRQCINVDCCQSSPCVHGGSCIDSINTYTCQCPKGFGTGRCE  
 IHINECSSDPCQHGGTCSDRIGSYSCYCRPGYTGSNQCQHLDRCANPCRNAGATCRRTGEDLSDFHCECPLGYKGTICDVKEV  
 SCAVAGTICANGGTCFDSNGVQSTCCKPGFTGSYCRTNIDECAKGPCKYGATCHDAVANYTCTCTAGFTGKNCDININECAS  
 NPCQRGSCLDLVNGYLCSPKGYIGKHCEVNADDFVFNACFNGGSCVDGIAEFKCTCPLGFSGRCEVDVDECASSPCALG  
 TEKCINNIGAYHCQCKQGFGRHCDLNINECLSYPCRNGGECKDGAGEYTCCLPHGFSGDDCERRDECLSAPCRNGGTICIDG  
 YGSYCKCPLGFAGANCEESINECLSQPCKNGGSCRDIVNGYKCDPCSKMIGKNCETVVKDQCPVPCAKKFDGGKCNPKC  
 NTHECNWDGTTCSLGIPEWSNCTTVTKSGKACYQVFANGVCDRENTGGCLFDGDFCKPSVPKCGADKYCAARFANAEC  
 AICNNVACQNDGLDCSFKKPEIVEGTLLVLLVPEAFNACFNGGSCVDGIAEFKCTCPLGFSGRCEVDVDECASSPCALG  
 RRRKSAEKIWWVQVINLDRGCETDCFQSTEQAAYKLGAAQSTGKLNLPYPVYSEKPTVEPETGFQPEPLWAILCVGVPPLFI  
 VGVLAGGKRVYTKLWLPEGFVRRPVHQRRLRRDPVGOEHSMRSMNKSSDLEEEGAVGGDLTPPQEARDAKRVKLEEVDE  
 SQRVKVSEKEKDRQWTRLHREAADVTVRNCTALALTPPQGESEKPGIDTGV DARGPGGFTPLHLASCRGTLVDGCSIDD  
 DKESDDSGGAMVSDLLALGASYGARTDIEKETPLHLAARHSRADAARLLHAGADPNARDKLRTPHLAVGADAQGVFQ  
 ILLRNRTDLEAAMEDGTTPLILAARLDLLDIVKDLIKASCKVNNVDAQGKSALHWAAA VNSHEVTSSELCKNGAKKDMQD  
 DKGQTPFLGAREGSLEAVRILLLSYANRMIADNMDKTPEEVARQRAHNDIVELLSDWSIGCNSPKAAPAPTSPPDQRSPLN  
 GTASPPSMDQISGNKVVTHTFPVSAGTTRPKTNTSTRGARSKVQENGAKRKRKRKDDDLPHGNRKASQGGASSTYSPYG  
 KELSPPSSGANFSPAFSVVNGLSPQGSATGISPSNSTLSPQQHSSLDANSPQFPLSDSPFDDGYLDLDFEDLTDQDLHGDF  
 ASPACGLRGSTDLHDSISMLPETTIGPVPQDSSVPTTACMYLPRHSVAPFGHTAPRLYSAHSSPNLCADNESRQLIVAHNSIN  
 GYPSNQSSIQACKLSNRLEEHVMMETTLHHNNQSMCVPEVESGMFREKHHTPPSAHSYGTSSYDSSPQKLPISYLTSPSPESPKD  
 WSSSPSSHSDWSN

#### >Corrected Notch Transcript

AGCTGCCCCGAAAAAATTACAGGGGCACGATGTGAAATAGATGTTGACGAGTGTACGACGTTGAGTCAGCCATGTCAG  
 AACGGCGGCACATGCTCAAATGTGTATGGCGGTTATATGTGCCGGTGCATCACGGGTTGGGATGGTGCCGATTGCTCAG  
 TGAATATCGATGAGTGCAAGCAGAACGACCCTTTTCCACGGTGCCAACATGGGGGAACTTGTGTGGACAAAAATCGGCT  
 CTTACACCTGCATTTGCCACCTGGAAAAACAGGCCTCGTCTGTAATTTTGTATGACGAGTGCAGCGTCAAAACCCGTGTAG  
 CGCAAATGCGACTTGCCTTACCTCCTTCTCTGGTAAGGCCTCGTGTATTTGTAACAGCGGCTGGACCGGAAAGAACTGT  
 GACGTGGATATAAAGGAGTGTGAAGGTGACTCGTACCCTGTTACCATGGAGGCACATGCCGGGATATTCCAGGAAGC  
 TTTGTGTGACTGCGTGCCTGGTTTCGACAGGAGCAGATGCGAAGATAACATCAACGAATGCGAATCGAACCCTTGTG  
 TGCATGGGCTTTGCTTGATTACAAAAACAATTCGAGTGCCTTGCAGCAAGGGCTATACCGGGCGCCTTTGCGACGT  
 CGAAATCAATGAATGCGACAGTAACCCCTGCCTTAATGGCGGCAATGTCACGATGGCCTTGTAATTACTCATGCACC  
 TGCCAGGTGGGGTACGTCGGCGAGATTTGTACAGCAACTATGACGACTGCGCGTCCAATCCCTGCCAGAATGATGGA

ACTTGTCAAGATGGGATTGCCAGTACACTTGCTTGTGCCCTCTTGGATTTACCGGGAAAAGCTGCGAGACGAACTA  
ACGAGTGCCTGGCAACCCCTTGTATGAATATGGGTACTTGTATCGATGGCATAAATAGCTTCAGGTGCCAGTGCCTCGCT  
GGGGTTACGGGGAATCGTTGTGAGACTGAGATTGATGAGTGTGAAAGCTCACCGTGTCAAACGGAGGCACATGCCAA  
GGATAAGATTAACGGATACGTGTGTATCTGCTCCTGGCGCAAGTGGCACTACTGTGAGAACGACCCAAATGACTGT  
CCAGCCAAATGCCTGTCAGAACGGCGGAGTTTGCATCGATGGAATGAATACCTACTCTTGTAAATGTCATCCGGGTTTTA  
CTGGCTTCAGCTGTGGCGTCCCTGTCAATGAGTGTCTTCCGCTGCTGTAATGGCGGGACTTGTGAGGATGGCGT  
GGCCAGTATTATTGCAGATGTCTGTATGGTTATACTGGTAAGTCAAAAAAGTTCTCTTACATTAACCTACAAATG  
AAAAATGCACATTCATTTTCAGGTA AAAACTGCGAAGTTCGGATTGATAGTTGTATCGACCACACCGTGTCAAATGGCG  
CCTCTGTGTGAGCTCAACACCGTACGCGTATTCTGTCACTGTA AACCTGGTTATACCGGACAGTACTGCGAGACTGA  
CGTAGATGAATGTGCAGCGAGACCCTGTGTA AACGGGGCATGCGTGGATGGTGTCAATGGGTTCAATGTGCGATGCGA  
TCCTGGCTTACTGGCGATCGTTGCCAAATCAACGTGATGACTGTCAATCAAGCCCTTGTGTCCATGGCGGCTCTTGT  
TCGACAGCATCAATACATACACATGTCAGTGCCCAAAGGCTTACAGGCCACAGATGCGAGATCCACATCAACGAGT  
GCTCCTCCGATCCCTGTCAACACGGTGGCACTTGTAGTGACAGGATCGGCTCGTACAGCTGTTACTGCAGACCTGGATA  
CACTGGGAGTA AACTGCCAACCCACTCGACAGGTGCGCTAACGACCCATGCCGTAACGGAGCAACATGCCGAAGGAC  
AGGCGAGGATTTATCCGATTTCCACTGCGAGTGCCTCGGCTACA AAGGCACTATTTGTGACGTCAAAGAGGTGTCC  
TGTGACTCGCGGTA CTATCTGCGGAAATGGGGGAGCTGTTTTGACTCGAATGGAGTGCAGCTGTCAAATGGCG  
CTGGCTTACTGGAAGTTATTGTAGGACGAACATTGACGAGTGCCTAAGGGCCTTGC AAGTACGGGGCTACATGTCA  
TGACGTGTGGCCAACTACACTTGCACCTGTACCGCGGATTCACTGGGAAAACTGCGATATCAATATCAACGAATGC  
GCCTCAAATCCGTGCCAGCGGGTCTGCCTGGATTTGGTCAACGGCTACCTTTGCTCCTGCCCAAAGGATATATTG  
GCAAACTGTGAAGTCAACGCTGATGATTGTTTCGTA AACCGCTTCAATGGTGGTTCGTGCGTGTGATGGTATTGC  
AGAGTTCAAGTGCACGTGCCCGCTAGGGTTTTCCGGATTCGCGTGTGAGGTTGACGTGACGAGGTTCCAGGCTTCCAGCCCA  
TGCTCCGCGCTCGGAACCGAGAAATGTATAAATAACATTGGTGCCTACCCTGCCAGTGTAAACAAGGCTTCCCTGGTC  
GTCACTGCGACTTGAACATCAACGAGTGCCTATCGTACCCGTGCCGTAATGGAGGCGAGTGTAAAGATGGTGCCTGGG  
AGTACACATGCTTTGTCTCACGGATTCTCAGGAGATGACTGTGAGCGCCGCGATGAATGCCTCTCAGCTCCTTGTGA  
GAATGGTGAACGTACTCGACGGGTATGGATCCTACTACTGCAAAATGTCCTTGGGTTTTCCGGGGCGCAAACTGGCA  
GGAGAGCATCAACGAGTGCCTGAGTCAAGCCGTGTAAGAATGGAGGAAGCTGTGAGATATCGTGAATGGCTATAAGTG  
TGACTGCCCTCTAAGATGATAGGCAAGAACTGCGAAACGGTGTGTAAGGACCAAGTGCCTGTTCCAACTGTGCTAAG  
AAATTCGACGGTGGGAAATGCAACCCCAAATGTAACACGACGAGTGTAACTGGGACGGTACTACATGCTCGCTCGGC  
ATCGACCTGGTCCAACTGTACCACCGTGCACAAATTCGGAAAGCCCTGCTACCAAGTATTCGCCAACGGAGTTTGGC  
ATCGTGAGTGCAACTGGAGGTTGTCTGTTCCGACGGGTTGACTGCAAGCCGTGCGTGCCTAAGTGTGGCGCCGATAA  
GTATTGTGCGGCGAGGTTTGCATGCGAGTGTGATGCGATTGTAATAACGTGGCGTGTGAGAACGACGGGTTGGA  
CTGCAGCTTCAAGAAGCCGAAATCGTAGAAGGGACCTTAGTCTCGTACTACTAGTAGTGCCGGAGGCGGTTATGAA  
TGGATCACTGTGTTTCAATGCGCGAGTTATCCAGGACCTTGAACACCTTGCCTTTAATAAGAAGGATACGCAAGGAAAA  
GAGCTGGTCAAGGTATAACCCCTCCCCCTTACGACCCAGTCCCGGCCGAGCGGAGGAAGATCAGCTGAGAAGATT  
TGGGTTCAAGTCCAGATAAACCTGGACAACCGAGGCTGTGAGACAGATTGTTTCCAGAGCACAGAGCAAGCGGCGAAA  
TACTTGGGTGCCAACAGTGCACCGGCAAACTCAACCTGCCTTATCCCGTATACTCTGAAAAACCCACCGTGAACCCG  
AAACAGGATTCACCCGAGCCTTTGTGGATTGCAATTTTTCGCTAGGAGTACCCTGTTTCATCGTTGGTGTGCTCGC  
AAGCGGTAAGCGCTTACACCAAACCTTGGCTATGGCTACCCGAAAGGTTTCGTGCGCCGGCTGTACATCAGAGCCGACT  
CAGGCGGGATCCAGTTGGACAGGAACATTCATGAGGTCGATGAATAAAAAGTTCAGACTTGAAGAGGAGGGAGCGG  
TGGGTGGGATCTAACGCCGCCACAGGAAGCCCGCGACGCAAGCGCGTCAAGCTTGAAGAAGTAGACGAATCAG  
CGGTA AAAAGTGAGCGAAAAAGAGAAAGACACTCGGCAATGGACGCGTCTGCATCGTGAAGCGCGGACGTCACTGT  
AACGAAATGGCGCGAAAAAGGAAGCGAAAGCGGCGTAAGGATGACGATCTCCCGCACGGTAATCGCAAGGCGAGTCA  
GGGGGGAGCAAGTTCTACTACTACCCCTACGGGAAAGAGTTATCTCCTTGCAGCAGCGGGGGCAACTTCTCTCCCGG  
GCTTCTCCGTCGTGAACGGGCTCTCGCCCAAGGCGAGTCCGCTACAGGGATTTCCGCTTCCGAATTAACAACGCTGT  
CGCCGACGACGACTTCTCGTGGATGCTAACTGCCCCAGTTCCTCCGCTATCGGACTCTCCGTTTCGATGATGGATACTT  
GATCTGGATATCTTGAAGATCTTACGGATCAGGATCTACGGTACTTTGCGAGCTTGGCCAGCCCGCTCGGTTGATGAGGGCA  
GCACATCTGACCTTCATGACTCCATTTCCATGCTCCCTGAGACGACTATAGGCCAGTCCCTCAGGACTCCAGCGTGCC  
CACGACCTCGGCTTGCATGTATCTGCCGCGGCATAGCGTTGCGCCGTTTGGACACACGGCCCCGAGACTATATTCTGCT  
CATAGCAGTCCGAATTGTGCGCCGAC AACGAGTGCGGCAACTATAGTAGCACATTCAATAAACCGGTTATCCGTC  
ATCAGACTCTATCCAGGCTTGTAAAGTATCAAAATGACTGTAAGAAACACGTTTATGATGGAACACCCCTGCATCACA  
TAATCAGTCCATGTGTCTTGTGGAATCTGGAATGTTTCGTGAAAAAGCATTACACCCCGCTCCGACACTCGTAC  
GGGACATCATCTTACGACTCATCTCCAAAAAACTACCCATCTCTACCTACTCCCTCCCGGAGTGCCTAAAGATT  
GGTCACTTCGCCCTCTCGCACTCTGATTGGTCAAATTTG

>NvDeltaCoding

ATGCAGCTACTACCACTCCAGCCATCACGTCCCCATGTCTCAGCATCTAGCCGATTGCTACAGTCTTTCCTGACGCTTAC  
ACTGGTTTTACATACTTTTTCCACCGCATGTCGCCGGGCAAGGCGTGTTCGAGGTA AAAACTGCGTCGAGTGTGGAATCCG  
GGCGGGCTAACTTCACTGCTCAGTGGTGCAGTGGGATGGAAAGTGGACGGAAAGTGGCCCTACCGTCCCGGACATAC  
GTCCGGGCTGCTTAAGGCAGTACAGCCCCGGACACCCGACTGCACCTTTGCGAACATGCTCACCTCTGAACTCG  
GACAGGACTATTACTGCACCACGCGACCATGTCATCCGTTTGACATAGCGTCTAGCTGGCCGGGCTCATTCTCGAT  
GATTGTAGAACTGCGCTCTTTAGAACCCGGTGGTTTGATAGCGCGGACGGAAATAAGAAGGGAAACTTTTTTCTGGA  
AACTTTGGGCAAACAAGCCACATAGGTGTGTCATCGAACTTTAGCTTGTCTATCCGATGTTGTCGCAATCCCAACC  
AGTACCGGTGATTCCGCTCGAAGTTTTGCGAACCCAGTGTGATAAAATGGTGCATCTGCAAAAACACAAATCCAGGACAGTACAA  
GCATGTCTGCTTACCAGGCTGGCAGGGACTTCTTACTGCACAACCTCTGTTTGTAGTAAAAGCTGCAGACCAAATGGA  
AACTGCGTCAGCCCAGATAGATGCAGTTGCCAAGGTGGCTGGACAGGTCCCCAGTGAATCAGTGCCTGCCCCACCCG  
GCCTGCGTGCACGGGACGTGTAACAAGCCTTTTGATTGCATCTGTACGCTGGATGGGGAAGCTTGTACTGCGACTTGG  
AATTGGACTACTGTGGTCGCAACAATCCTTGATAAAATGGTGCATCTGCAAAAACACAAATCCAGGACAGTACAAAT  
GCATCTGTAAGCCAGGATACACCGGCATCAACTGTCAACATGAATTAATGAATGTGATAGTAGTCTTGGCAAAAACG  
GGGGGATGTGCAAGGATCTTCAATGACTTTAACTGTACCTGTCCAAACCGGTTTACCAGGAAAGAAATGCGAACATAA  
TATCGGCGATTGCTTTGATGGCGCGTGTCAAAAATGGCGGCACATGTGTGGACGGCGTCAATCGGTACACCTGCTCTGT  
CCAGCGGGTCTCAGTTCGAGCATGTGAATTTGCTGTGATAAAACGACTGGAAGACGACTGGAAGACGACTAGACTGTGGA  
AATTCTACCTCAGTTGGAACCGGTGAACATGGGTCTAGCTCAAGTTGGGATGAGAATAAGACGCTAATATTACCGATA  
GTTCTGTGCGGTGCGGCTGTATTGTGTGTTATTGCGGGTATTCTTGTGTGAAAACCTGTGCGAAAGCGGCCGTTCTGTTG  
CTTCGCGTCTAGTGCAGAAAGGTGATCCTCAGGAATCGAACACTTGCACGGAAATCAGACCGGTTGATCCGGCTGTCAA  
ACAAGTTGATCTAGATATGGACCCAAAGAGACTTAAACGAGACGGCACTCAAACACTGCGGGGCTGGAGGGACCAAT  
CCGAAAAATCCGACATTATTATTAATTTCTGCTTCCAGCCCAAGAAAGAAATGATAAATAGCAGACTAGACTGTCAA  
ACTGTTGGAAGAAAACCTCCTCCAGAGAGGGGAAAGGGGAAGGAAATCCAGATTCTCTAAAGCTGAAACTTCAAGG  
GCGTCCATGGAGTTGTCGAGATAGTACCAGAGCAAGATTTGGGGAACTTTTCTACCAAACCGCTGTTTTGATTACG  
GTTACTGGCAAGAAGTGGAAAGTGGAAATATAA

>Delta Translation

MQLLPLQPSRPHVSASSRLLQSFLTLTLVFI LFPFHVAGQGVFEVKLR RVWNPGRNFTRQCCSGMEVDGKCALPCRTYVRA  
CLRQYSPGHPTDCTFANMLTSELGQDSFTAPRDHVIRFDIASSWPGSFSMIVELRSLEPGGLIARTEIRRETFPPGKLWANTSHI  
GVSSNFLSFRMVCNPNQYGDSCSKFCEPRDDKFGHMTCDANGTHVCLPGWQGLPYCTTPVCSKSCRPNGNCSVPDRCSQ  
GGWTGPQCNCVPHACVHGTCNKPFDICITPGWGSLYCDLELDYCGRNNPCINGASCKNTNPGQYKICKPGYTGINCQH  
ELNECDSSPCQNGMCKDLFNDFNCTCPTGFTGKKCEHNIGDCFDGACQNGGTCVDGVNR YTCSCPAGFSGRACEFAVDK  
TTGRPTTTTGDNSTSVGTGEHSSSSWDEKNTLILPIVLCGAAVLCVIAGILVWKTRKRPFCFFASSAKGDPQESNTCTEIRP  
VDPVKQVLDMDPKRLNETDLKHCAGGKTSRKNPDIIFVPSHAKKNVNSRLDCQTVGRKLPFERGKGKEIPDSPKAET  
SRASMESEIVPEQDLGELFLPNRCFDYGYWQEVVEI

>NvHes1

ATGAAGCGAGCACTCGAATGCGAGGATGACGAGGAAGAAGTCCAAGAGACTCTTAGCCACGATCAGGATGATACAAA  
TGCAAAGGAAACGAAGACGAGGATTGATAGAGAAGAAAAGAAGAGATCGTATTAATAGATGCTTAGTGAGCTACGCC  
GACTTGTGCCGACAGCTTTGGAGAAGGAGGGCTCCTCGAAGCTCGAGAAAGCTGAGATCTTGCACTTGACAGTGGAGC  
ACTTGAAATGGTTAAGAAGCACATCTGGACAAAGCCGCACTGTGTGCACAGAACAGAGTGTACGGACTACCGCGCAG  
CAGGCTTTCAAGAGTGTCTTACTGAAGTCGCGAAGTACATGGTACGATCAATAACGACGAGTGCATGGGTGACGACA  
AGGCCGCTGTGATGGCGCAGATGACAGGACGCTCACACCCGTTGATTACAGACCCTGTCGCTGGTTATCACTACACC  
GTAATGTTGTGCTTTTTTCCCTGTATGCCATGGGTTGGCCTCTTGGGCTCGCCACCCAGTGCCAAATACCACCCTTG  
CCAACCAATCCCTCGCAAGCCCAAGTGA AAAAGGACCCCTCAGATGAAGGTCCAGAAATACCAGCTGACGCGGACGGC  
TCGTAAGACTCGACACGGGTTTGAAGGCGGGGGTGCAGGACTCCAAGGTGTGCTTACCCTGATGCAGTTCAT  
CTTGTCGCTTGGTGACCTGTTGTACGATACCTATCGACTTCCATTCTCCATGATGACAAAAGTATGGGGAGGGACT  
GTGTTATCGACACCCGCGGGAGGGCGGGAATACACGAAAACACCACGGGACACCTTAG

>NvHes1 Translation

MKRALECEDDEEELQETLSDQDDTNARKRRRGLIEKRRDRINRCLVELRRLVPTALEKEGSSKLEKAEILHLTVEHLKWL  
RSTSGQSRVCTEQSVTDYRAAGFQECLTEVAKYMATINNDECMGDDKARLMAQMTGRSPPVITDRVAGYHSHRNVVVSF  
PVMPMGWPLGLATPVPIPLPTNPSQAQVKKDPSDEGEIPADADGSLKTRPGFEGGGVQGLQGVLDRAVHLVRFHGPVV  
RYPIDFFSMMTKYGEGLCYRHPREGGNTRKHHGTP\*

>NvHes2

CAGGCGAAAAAACCGTTGATGGA AAAAATGCGGAGGGCGAGGATAAACGACAGTCTAAACGAGCTAAAAAGCCTTGT  
TTACAGTCTTTAAATAAAGATGCATCGCGTACTCTAAAATGGA AAAAGCAGATATTTGGAAATGTCTGTGCAGTAT  
TTGAAGGAAATCAGGAAGCAAGAGAACCTCGTATAATGAAGCACACTCGATAGCGGAGTACCGCGCAGGGTTCAACTAC  
TTGCAACAAAAGAACTACAAAAGAACCTCACGACTTTGAGTCTCCGGCAACCGACAAAGCTCCGATCAAACTTGAAT  
CACCTCGTAACCTGCTTCCAAGGGAACACGACGCCCGGTGCCGCCACCACACCTTACGGGGTACCTGTGTGGATATAACC  
CCTCCCACCACCATCACCCTCAGCTCTCGCCACCGATATCCCACTGAGCTCGCATGTCTCGTCTCCGCCACAAACC  
TCGTTGTTACAGGAGAGAACAACACAGGACATGCTAACGGCCGTGAAAACCTCCACCCCTCAATTATGGAGGCCCTGG  
TGA

>NvHes2 Translation

QAKKPLMEKMRRARINDSLNELKSLVLQSLNKDASRYSKMEKADILEMSVQYLKEIRKQENSYNEAHSIAEYRAGFNCAQ  
EVTKNLTTLESPATDKLRSNLLNHLANCFQGNTPGAATTPSGVPVWIYSPPPSPLHVSPPISPLSSHVSPPQTSLLQERTTQ  
DMLTAVKSTPQLWRPW\*

>NvHes3



ATGGCCGTTGACTGCATCGATAGCTCGGATTACGTGAGCAAAATATTATCGGACAGGAGAAAGGCAAAGAAACCAATG  
ATGGAAAACTGCGAAGAGCAAGAATTAATGACAGCTTGAACGAACCTAAAAGTCCCTTGCTGGAACCTTCTAAATAAA  
GATGCTTCAAGATATTCGAAAATGGAGAAAAGCTGATATCCTAGAGATGACAGTCGGCTACCTTCGAGCCGCCAGAGG  
ATAGAGAAGCGAACTCAAGGTTCTACACCACCTCTGATTTCCGTGCTGGATTCAACGCATGCGCAGTAGAAGTATCGA  
ATCGTCTCTCTCTGCGGATGCGAATACTGATAACCTACGAGAAACACTGCTCTCCACCTTGTCACAGGTTGCCATGG  
GAACACCACTCTCAGTCGACAGCCCTGGTAGCTCCGAGCTTTTCTCCGGCACCATGTGGGTTCCATACCCCTCTCCG  
CACCTCACCCATCAACCAATCATCGAGCTTCGTCAACGCCGCCTTGCAGGAGGTTTACGACCCGCTGTCCTCTGTGAG  
CCCGTGCAGCATCGCCGGCGCAGACGACTATCGTCAGCACAAACGCGAAAAACAACAGAAAGGAGAACCAGCACTGT  
GGCGCCCATGGTGA

>NvHes3 Translation

MAVDCIDSSDYVSKILSDRRKAKKPMMEKLRRARINDSLNELKVLVLELLNKDASRYSKMEKADILEMTVGYLRAAQRIEK  
RTQGSTPPSDFRAGFNACAVEVSNRLSPADANTDNLRETLTSLHLVGTGCHGNTTPQSQTLVAPSFSSGTMWVPYPPSPINQ  
SSSFVNAALREVSRLSPVSPCSRPAQTIVSTTRKTERRTALWRPW\*

>NvHI1

ATGGTGCAGGATTCTGCAAAAAGCGAAAAATGACCGAGGCAGAGAATGATATTGATGACCGAMAGTGGTCTAAGCC  
TGTGATGGAAAAGAGACGCCGTGAGCGCATCAACAGAAGCTTAGAAGAGCTCAAGAGGCTGCTTTAGAAGCTCAGCA  
CCGCGATTGTTCCGATACACCAAGCTGGAAAAAGCGGACATTCTTGAGATGACTGTTAAGCACTTAAGAACGCTGCA  
GAGCAACAAAAACAGCCATGGCTTTGTCTAACCAAGCTACCAAGCGAAGTGTGTGACGCTGCAATGGATGTC  
TGTACCAGAGTCACCCAATTCATGGTCCCTGGCCAGCACCCCATGCTGGTACATATACTACCCGCTCTGGCTCTTCC  
CCATACAGCTGCAGTCACCTTCCGGTGATAATACGGAACGGAACACGAGCACTACGAGCCGATGATTTCTGTCCAC  
TCTTGAAGTGAACACTAATCAACACGCTCTGCCGCTACGAGTGACGCTAACGGACGCCTGGTGCCTTCTACTTGTGC  
CAAACGAAGGATTTCCGTGCGAGTGTGGGCACAGTGCCAGTTCCGTTTATCCAGTGTATAGCAGTGACGTTGCTTCTA  
CCTTACAGCTATTCTCAAGCCTTATTTCCCGCGGACAGCCCGTAGGCTTCCCAAGCAGAGAACCTTATGGAGACC  
GTTCTAA

>NvHI1 Translation

MVQDSAKDEKTEAENDIDDRXWSKPVMEKRRRERINRSLEELKRLVLEAQHRDCSRYTKLEKADILEMTVKHLRTLQSQ  
QKTAMALSNQAHQANCCAGCNGCAVTEVTQFMVPGQHPMPGTYTTRPGSFPIQLQSPSGDNTERNTSTQQPMISVPTLELN  
TNQHALPLTSDANGRLVPSYLCQTKDFRASVGTVPVRFIPVYSSDVA STLHAIPQALFPAGQPVGFPSREPLWRPF\*

>NvHes4

ATGGAATTGGATGTGCTGAAAAAACAGAACGACAGTAATAAAACAAGTCTTAAAATGGATAACAAAACAGTCTAAAAA  
GCCGCAATGGAGAAACTTAGAAGAGCAAGGATAAACGACAGTCTAAACGAGTAAAATCACTCGTCTCGAGGCAAT  
GAAGAAAGACGCTCAAGATACTCGAAAATGGAGAAAGCTGATATTTGGAAATGACAGTAAAATATCTTCGTTCCGGC  
CCCGAAAAACAGTCAAGATTTAGATCCGACGCTCGCTGGCGAAGTACCGCGCCGGGTATAACGAATGTGCGGGCGA  
AGTGACCCGATTCTTGTCTCGGAAAACGCTCGGACAGCTAAGAACTCAATTGCTCTCTATCTCGCGTCTCGGT  
GTTACACGCAAAATACCAACCTCGCGTGGGCTCCACGAGCGCCTACCAACACCATGGCGCATTAGTCTTGCACCC  
GACTCCAGGCAAGGTTAGCGGCTTTTCCACCGCATTGGCCCGCTTCAAATGTCGTTAGTTTTCCGCCAACCTTCCAT  
TGCGCCGCTTTCGCGCTTAACCAACAGGATTACAGGACTTCTTAGATTAACGGGAGCTTACAGGTGTTGCTCAGTAA  
TGGGATTCTGCGCTTATTGTACCGAAGATTCTTACATTTGCTGCCTTTGACTTGGCAGAAGTCTTGGCGCCTTACG  
ACTCTTCTGTGTGGAGACCGTGGTAA

>NvHes4 Translation

MELDVLKQNDNSKNTSLKMDNKQSKKPQMEKLRRARINDSLNELKSLVLEAMKKDASRYSKMEKADILEMTVKYLRSAP  
KQSKISDPTSLAKYRAGYNEAAEVTRFLSSENVSDQLRTQLLSHLASRCYTQQIPNLAWAPRAPNTMAHSLVHPTPGKV  
SGFSTAFGPPSNVVSANLPSPPSPLNQDSSLRLTGASQVLLSNGIPAVIVPNDLHLLPLTWQNSLAPYDSSVWRPW\*

>NvHI2

ATGGCGCAGGAAAAACACAGACATTTGGATGAGTGTGCTGTGTGGGTAGCTTTCCCAAAGTCAAGAGACGAAGGATTATG  
AAGCCGATCACCGAGCGACTGCGAAGAGAAAAGAAATTAACAGCAGTCTAAAGGAGCTGAAGTTTTTAGTCTTAGCGCT  
CTGGGCCAAGACGTTTACGATACTCTCGCATGAAAAGCCGACATCCTTGAGATGACCGTCAGTTACATTTCGCAAAA  
TGCAGAGGAAAAGCAATGGCCAAGATGTCACAGACTTCTTTCTCCCTTTCGCTGCCGGAGCCTGGTACAAAAGCTCAAG  
ACCAGAGCCGCACGAAGGCACCAGACTTCGCATCACGCAACCGATGCACACGTACCGACTCGCCACAGTACCCTAAA  
GTCCCTAACAAACGATGACGTCAGTGTGAGTTAAGCAGTGGTATCAACGCAGAGTACGCGGGATCGGCCATCTGTTC  
GTTGAAAACCAAGCAAAACTTTTCTCCCAAGAGATCCACAGCAGAGGCTTCTCAACCCATGTTAGTATAGGGACCCAT  
TGTCTCCATCTAATAGTATAGTCCGATCCCTGACTTGTGACGCTCGCTTTGGCAACGATCAGCGAAAATTCACGA  
CAGAGTGGAAATGCGAAAAGTTTGTGCGCCCTGAAGAAGAGGCTGCCGGAATGGAGTGTATACCGCGGTAGAATGA  
CCTTGAGTGAAGACAAGGAGAAGTATTGATCAGAGCAACGACCCTCGGATGTGGCACTACCGCCGCGATATCGACTTTT  
CTCTCTGTGTGGAGACCTTGGCATTAA

>NvHI2 Translation

MAQEKHRHLECCVGSFQKVRRRIMKPIERLRERINSSLKELKFLVLSALGQDVSRYSRMEKADILEMTVSYIRKMQRK  
SNGQVDVDFPLRCRSLVQSSRPEPEHGTTSHHATDAHVPTRHSTLKSPNDDVTSSELSSGINAEYAGSAICSLKQNFSP  
QRSTAEASQPMVSIHTCPSPNSIVRIPDLGSPLATISENSTTEWNAKLSPLKRLPGMECFIRGRMTLSEDKENFDQSQRPS  
DVALPPRYRLFSPVWRPW\*

>NvHI3

ATGGAAAAAGCCGAAATCCTCGAGCTCATAGTAACTTTCTCAAAGTCATCCAAAGCCGCAGAAATACTGTTATGCCG  
CGGCCAGATCTCGAAAAAGCCAATGAGTTCACCACGTGAAGATGGAGCAAATGAGCCAGAGCAAAGCGAACGCAAG  
ACAACACCCGGTGTGTTTACCAGTCAACTCTCTAAGCCCTCTGCTGTCAAGGTTGCAGGCCGGTCAAAGAGTTTGT  
GAACCTTACGTTGTCGCCGCTCCACCATCCATGTACAGTCTAGCCAAACACGCGAAAGCTACCTGTGGCTGTGAACCCT  
ATGTCCCTGAGTACCAGCTTGCCTCGTCGCATGTTGAAAAGAGTTCGNACAAAGTTCTCAAGAACAGACAATGCAAACT  
GGCGAACAAAGTCCAGTAAACCTTACTCGAAAAGGCAACGCCGAGCCGAATTAACCTAAGCCTAAACGAGTTGAAAAC  
ACTGGTCTGTATCACTATATCAAAAAGTCTCAAGCCGAACAAAAGTGCAGAAAATGGAAAAAGCCGAAATCCT  
CGAGTCACAGTAAACTTTCTCAAAGTCATCCAAAGCCGCAGAAAATACTGTTATGCCGCGGCCAGATCTCGAAAAAG  
CAATGAGTTCACCACGTGAAGATGGAGCAAATGAGCCAGAGCAAAGCGAACGCAAGACAACACCCGGTGTGTTTCTAC  
CAGTCAACTCTCTAAGCCCTCTGCTGTGARGGCTGCAGGCCGGTCAAAGAGTTTGTGAACCCTACGTTGTGCCCGCT  
CCACCATCCATGTACAGTGTAGCCMACACGCGAAAGTACCTGTGGCTGTGAACCCTCATCATGTCCCTGAGTACCAGC  
TTGCCTCGTCGCATGTTGAAAAGAGTTCGCAAGCTCAGAGGTCGGCGATCTACACACATGTCCTGTCYCTAGTAAAGT  
CTGGAGACCGTGTTAA

>NvHl3Translation

MEKAEILELIVNFKVIQSRNRTVMRPDLEKANEFHVKMEQMSPEQANARQHPVCSTSQLSKPLCCQGRPGQRVCEPY  
VVAAPSMYSLANTRKLPVAVNPHVPEYQLASSHVEKSSXKVLKNRQCKLANKSSKPLLRQRRARINHSLNELKTLVLSL  
YQNCPEAQNEKMEKAEILELTVNFKVIQSRNRTVMRPDLEKANEFHVKMEQMSPEQANARQHPVCSTSQLSKPLCC  
QGRPGQRVCEPYVVAAPSMYSVAXTRKLPVAVNPHVPEYQLASSHVEKSSQAQRSAYTHVSAPSKVWRPW\*

>NvRds12

ATGGGGCAACGAGCGCATGACAAAACCAAGTTAATACTAAGTTATTCTATCTTCTGTGACACACACTACTACAGCTATG  
CGTGGCATAAGTACTGTAAATACACCGATGACAAGCACGGGCATTATCAATGCGATCTCCATGGCAACAAGGTATGTT  
GCTGGGTGGTATATACCACAGGGGAACGTGATTAAGTACTGCGTACCACAGAACGATGACATCAGAGGGCATTATTC  
CTGTGATTCCGAAGGTAATAAAGTTTGCAGAAAGGGTGGTATGGACCGCTAAATGGCTGCCTTTGACGGCCAAAGAA  
TAGTGATCCCGGTCATTACACATGTAATAGAACAACGGGTGAGAAAATCTGCCTGAAATCATGGTTTGGAAACATTGTGT  
ACAATATATTGTGATGAATCGAAGGGAAATATAGTTGTAACGCAACGACAGGTGAGAAGATTTGTCACGCTGGATGG  
TATGGCAATCTGTGTGACACCTATTGTATTTGACCAATGACAGCTCTGGACATTACACATGTAATGCAACGACAGGAG  
AAAAGATCTGTGACAGTGGATGGCATGGGAGATTGTGTGACACCTATTGTATTCCAACCAATGACAGCTCAGGACATTA  
CAGCTGTAACGTAACGACAGGAGAGAAGATCTGTGATGCTGGATGGTATGGCAATCTGTGTGACATTTATTGTATTCCA  
ACCAATGACAGCTCTGGACATTACAGCTGTAACACAACGACGGGTGAGAAGATTTGTCACGCTGGATGGTATGGCAAT  
CTGTGTGACATCTATTGTATTCCAACCAATGACATCTCAGGACATTACAGCTGTAACGTAACGACAGGAGAGAAGATCT  
GTCATGCTGGATGGTATGGCAATCTGTGTGACATTTATTGTATTCCAACCAATGACAGCTCAGGACATTACAGCTGTAA  
CGC

>NvRds12Translation

MGQRAHDKTKLILSYISIFCDTHYYSYACDKYCKYTDKDKHGHYQCDLHGNKVCPLGWYIPQGNCIKYPQNDIRGHYSC  
DSKGNKVCRRGWYGPLNGCLCRPNSDPGHYTCNRTTGEKICLKSFWFGLCTIYCDSEKGNYSNATTGEKICHAGWYGN  
LCDTYCISTNDSSGHYTCNATTGEKICHAGWHGRLCDTYCIPTNDSSGHYSCNVTTGEKICHAGWYGNLCDIYCIPTNDSSG  
HYSCNTTTEKICHAGWYGNLCDIYCIPTNDISGHYSCNVTTGEKICHAGWYGNLCDIYCIPTNDSSGHYSCN

>NvRds11

TGGTATGGCCAGACTGCACTACAAATTGTAAGTACTCCCCGAAACGATAGTTTTCGGCCACTATGAATGCGATTCTCCACTG  
GTGCTGTGGTGTGCCACAGCGGTGGTATGGGCCACTTGCACAGTGAATGGGCCAAGATATGTCGCAATGACTGGTA  
CGCGGTGAATTGCACGGAATATTGCACACCGCGAAATAAAGTCCGAGGGCATTACTCATGCGATATGGCAACCGGTGC  
CAAGATCTCGATAGCAACTGGTATGGATTAAGTGCACACCGCTTCTGCAAAACCAAGATTCTTTGCTGGGTCAAGTAC  
AATTGCAGCGTGAATGGCTCTAAGGTGTGCCATAGAGAATGGTATGGGGCCACATGTGATGTTTATTGCGTCCCACGTA  
ATGACAGTCTGGTCACTTTTCTGTAACACAAGTGGAGAAAAGGTGTGCCCTCAGAGACTGGTACGGGGACCGAT  
GTGAGATATTTTGTGTCACGAAATGACAGCTTGGGTCAATTATCATGTAACGCAAAATGGGACTAAGGTGTGCCATAA  
GGATTGGTATGGGGACCTCTGTACCACATCTGTAAAAACAAGGATTCGCTGAACTACACGTCGAATGGYACAAC  
AGGTGCTAGGATTTGTTTCCGAATTGGTACGGAGTGAACACTGACGAGGTTTTGCAAACTGATAATGAATCAACGTTT  
TTCTGCGTTAAGTCTACAGGAACACGTGTTTGTAAATGCTGGGTGGTACGGAATAAAGTGTACGACTCAATGTGTTGGGA  
GAAATGACTCCTTTGGTCACTACACTTGCCAAAAGATCTCTGGCGCTAAGATTTGTCACGAAAAGTGGTATGGTCAAGC  
GTGCACGACATTTTGGCAAGCGCGAAATGATTCCACAGGTCATTATTTGCAACTTGACCAACGGACAAAAGGTGTGC  
CATAGAGATTGGTATGGCCCGTTTTGTGATGTTAACTGCAACTCAACAGCTCTCATTTTACGTGTAACAAGACTACTG  
GAGCTAGGGTGTGCCACAGTAACTGGTATGGGACCTATTGTGACGTTTACTGCAACTCAACAGCTCTAGCCATTTTGC  
GTGCAATAAGACAAGTGGTGAAGGGTGTGCCATAGAGATTGGTATGGATCCCTTTGCAACGTGTCTTTTGCCTCAAG  
AACTGGTTCTGGGCCGAGATGCGATGTCTTCTGTGAAAGCGCAACTCTCGTTATGTCTGCGCACCAGGAAATGGATCGA  
AGATGTCTGCTGCTGGTGGACCGGGCAACTGCTTAAATCCCTATTCCACCATCAACAATGATGCTGCCATCC  
ATCTCCATCTTCTAGRGGCACCAACAATAGCTTCTGCTCTGCTCAATAGRACCGAGGCCGCTCTAGCTTTGAGCACAAAGT  
ATCTTAGCGACAGCAMATRAGCTGCACACTGTCAACAGGTCCGTATGGAATTCTACATCTCAGGTAATGACTAGCTCTG  
CCGAGTTTTGTGACCCCTAAAGACGTGCTCGGCCCAAGCGTTTCATCCTCGTCCGCTTCCGTGACGCTAARCATG  
ACGAATGTGCGCAGAGAAAACACTGCAGACTGAAAAGCGCAACACGTTGGAGATTGCGGTTGGGGCTTGGCTCTG  
GTGATCTTGGTAGCGCTCGTTATTGTGTGCGCATATACTTCGTCAAATTCAGGAATGGTTACCGGAAAGTGCCTGTG  
ATCTCTTATACTTTACAACGTAACACAATCAAATCAACAGCAA

>NvRds11translation

WYGPDCITNCTPRNDSFGHYECSSTGAVVCHSGWYPTCTVNWAKICRNDWYGVNCTEYCTPRNKVGGHYSCDMATG  
AKICDSNWYGLNCTRFCKPQDSSLGHYNCSVNGSKVCHREWYGATCDVHCVPRNDSGHSFSCNTTSGEKICLRDWDYDGR  
CEIFCLSRNDSLGHYSCNANGTKVCHKDWDYGLCTTFCNKNDSEHYTCNXTTGARICFPNWDYGVNCTRFCKPDNESTFFC

VKSTGTRVCNAGWYGINCTTQCVRNDSFGHYTCQKISGAKICHENWYGQACTTFCEARNDSTGHYSCNLTNGQKVCHRD  
WYGPFCDVNCSNSSHFTCNKTTGARVCHSNWYGTCDVYCNSNSSSHFACNKTGARVCHRDWYGLCNVDFCLKNWF  
GPRCDVFCESDNSRYVCAPNGSKMCLPGWTGANCLNPVIPPSTIMLPSPSPSSXGTNNSFALLNXTEAALALSTLATAAX  
LHTVNRSVWNSTSQVMTSSAAVLSTLKDVARPTSVSSSPSVTLXMTNVAEKNTADLKSDNTWRFVAVLGVVLVILVALVIC  
VAIYFVKFRNGSPEAAPVSLILYNVTQSNQQQ

|                 |                          |
|-----------------|--------------------------|
| qt_Nvhes1F1     | GGAAACGAAGACGAGGATTGATAG |
| qt_Nvhes1R1     | TGCTCCACTGTCAAGTGCAAG    |
| qt_Nvhes2F1     | AATCAGGAAGCAAGAGAACTCG   |
| qt_Nvhes2R1     | CAGTTAGCGAGGTGATTCAATAGG |
| qt_Nvhes3F1     | ATGACAGTCGGCTACCTTCG     |
| qt_Nvhes3R1     | CGTAGGTTATCAGTATTCGCATCC |
| qt_Nvhl1F1      | AGCAGCCGATGATTTCTGTC     |
| qt_Nvhl1R1      | CACGGAAATCCTTCGTTTGG     |
| qt_Nvath-likeF1 | ACAACGCATTGGAATTACTGC    |
| qt_Nvath-likeR1 | AATCAATCGCCAATCGTAGC     |
| qt_NvashD_F1    | TGCGGTAGCGAGGCGTAATG     |
| qt_NvashD_R1    | CCGCAACGTCTCCACTTTAG     |
| qt_NvashB_F1    | ACTCGTTAGTGACGGCTTCG     |
| qt_NvashB_R1    | CAGTTCTCAACGTCTCAACTTTGG |
| qt_NvashA_F1    | TGTAGTAGCGAGAAGAAATGCCAG |
| qt_NvashA_R1    | TTGCACTGCGAAGTGTCTTAAC   |

SupplementalTable2QuantitativePCRprimersusedinthisstudy
